# Supplementary material for: Adaptive Responses of the Sea Anemone Heteractis crispa to the Interaction of Acidification and Global Warming
Source: MDPI journal article supplement (doi:10.3390/ani12172259), 2022-08-31
Supplement: s1 [file s1]

**Table S1.** Seawater carbonate chemistry under experimental conditions.

| Treatments | $p\text{CO}_2$   | $\text{HCO}_3^-$<br>( $\mu\text{mol kg}^{-1}$ ) | $\text{CO}_3^{2-}$<br>( $\mu\text{mol kg}^{-1}$ ) | $\Omega_{\text{calc}}$ | $\Omega_{\text{arag}}$ | TA               | Salinity        |
|------------|------------------|-------------------------------------------------|---------------------------------------------------|------------------------|------------------------|------------------|-----------------|
| Control    | $473.3 \pm 7.5$  | $1563.1 \pm 12.5$                               | $132.6 \pm 5.8$                                   | $1.78 \pm 0.15$        | $1.19 \pm 0.02$        | $1603.5 \pm 3.5$ | $35.63 \pm 1.4$ |
| AC         | $923.2 \pm 17.2$ | $1834.7 \pm 7.9$                                | $77.9 \pm 1.8$                                    | $1.37 \pm 0.03$        | $0.77 \pm 0.05$        | $2114.8 \pm 6.9$ | $36.55 \pm 1.1$ |
| WC         | $481.8 \pm 11.5$ | $1615.7 \pm 20.7$                               | $141.3 \pm 6.7$                                   | $2.13 \pm 0.04$        | $1.32 \pm 0.01$        | $1698.7 \pm 5.1$ | $36.24 \pm 2.1$ |
| CC         | $937.5 \pm 13.3$ | $1871.4 \pm 14.0$                               | $85.1 \pm 2.7$                                    | $1.49 \pm 0.08$        | $1.13 \pm 0.03$        | $2235.3 \pm 3.1$ | $35.47 \pm 1.7$ |

AC, acidification conditions; WC, warming conditions; CC, combined conditions;  $\Omega_{\text{calc}}$ , calcite saturation state;  $\Omega_{\text{arag}}$ , aragonite saturation state; TA, total alkalinity.

**Table S2.** Changes in the levels of symbiont sterols in response to stress on day 3.

| Sterol                                                 | Control          | AC               | Control          | WC                 | Control          | CC                 |
|--------------------------------------------------------|------------------|------------------|------------------|--------------------|------------------|--------------------|
| Cholesterol Content (% of total sterols)               | $11.87 \pm 0.69$ | $10.89 \pm 0.19$ | $11.56 \pm 1.06$ | $9.33 \pm 0.74^*$  | $11.73 \pm 0.93$ | $7.83 \pm 0.33^*$  |
| Total sterols ( $\mu\text{g} \cdot \text{mg}^{-1}$ DW) | $16.98 \pm 0.77$ | $16.01 \pm 0.33$ | $17.21 \pm 0.47$ | $13.71 \pm 0.78^*$ | $17.03 \pm 0.37$ | $11.38 \pm 0.52^*$ |

Asterisks (\*) indicate significant differences compared to the control conditions ( $p$ -values  $< 0.05$ ). Three biological replicates were established under each set of treatment conditions. Average values  $\pm$  errors are shown. AC, acidification conditions; WC, warming conditions; CC, combined conditions; DW, dry weight.

**Table S3.** Changes in the levels of symbiont sterols in response to stress on day 15.

| Sterol                                                 | Control          | AC                 | Control          | WC                 | Control          | CC                |
|--------------------------------------------------------|------------------|--------------------|------------------|--------------------|------------------|-------------------|
| Cholesterol Content (% of total sterols)               | $11.93 \pm 0.41$ | $9.72 \pm 0.57^*$  | $11.43 \pm 0.56$ | $7.54 \pm 0.44^*$  | $10.99 \pm 1.13$ | $5.33 \pm 0.91^*$ |
| Total sterols ( $\mu\text{g} \cdot \text{mg}^{-1}$ DW) | $17.25 \pm 0.27$ | $14.61 \pm 0.33^*$ | $17.51 \pm 0.74$ | $10.71 \pm 1.21^*$ | $16.83 \pm 1.3$  | $8.98 \pm 0.72^*$ |

Asterisks (\*) indicate significant differences compared with the control conditions ( $p$ -values  $< 0.05$ ). Three biological replicates were established under each set of treatment conditions. Average values  $\pm$  errors are shown. AC, acidification conditions; WC, warming conditions; CC, combined conditions; DW, dry weight.
