# Supplementary figures and images for: Adaptive Responses of the Sea Anemone Heteractis crispa to the Interaction of Acidification and Global Warming
Source: MDPI journal article supplement (doi:10.3390/ani12172259), 2022-08-31

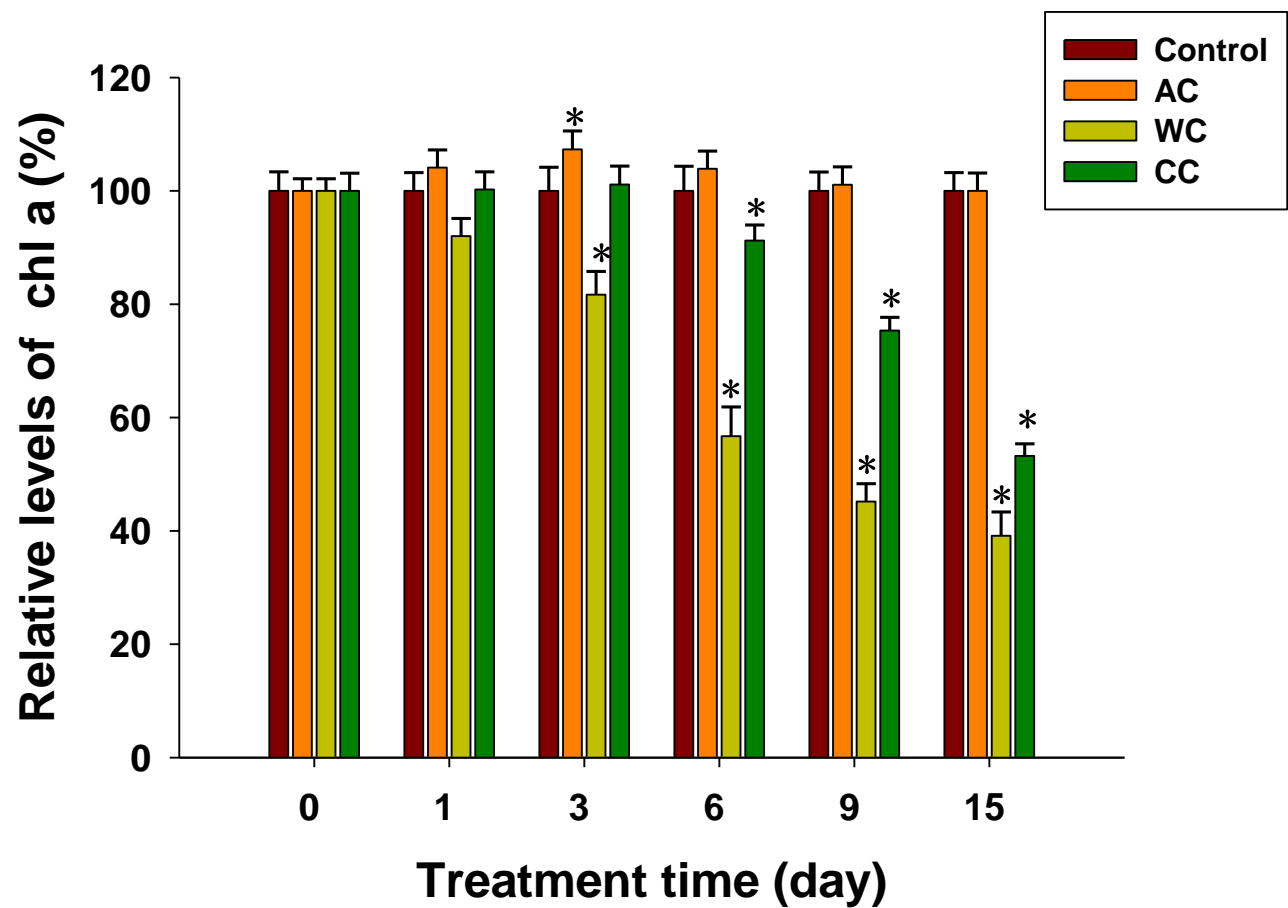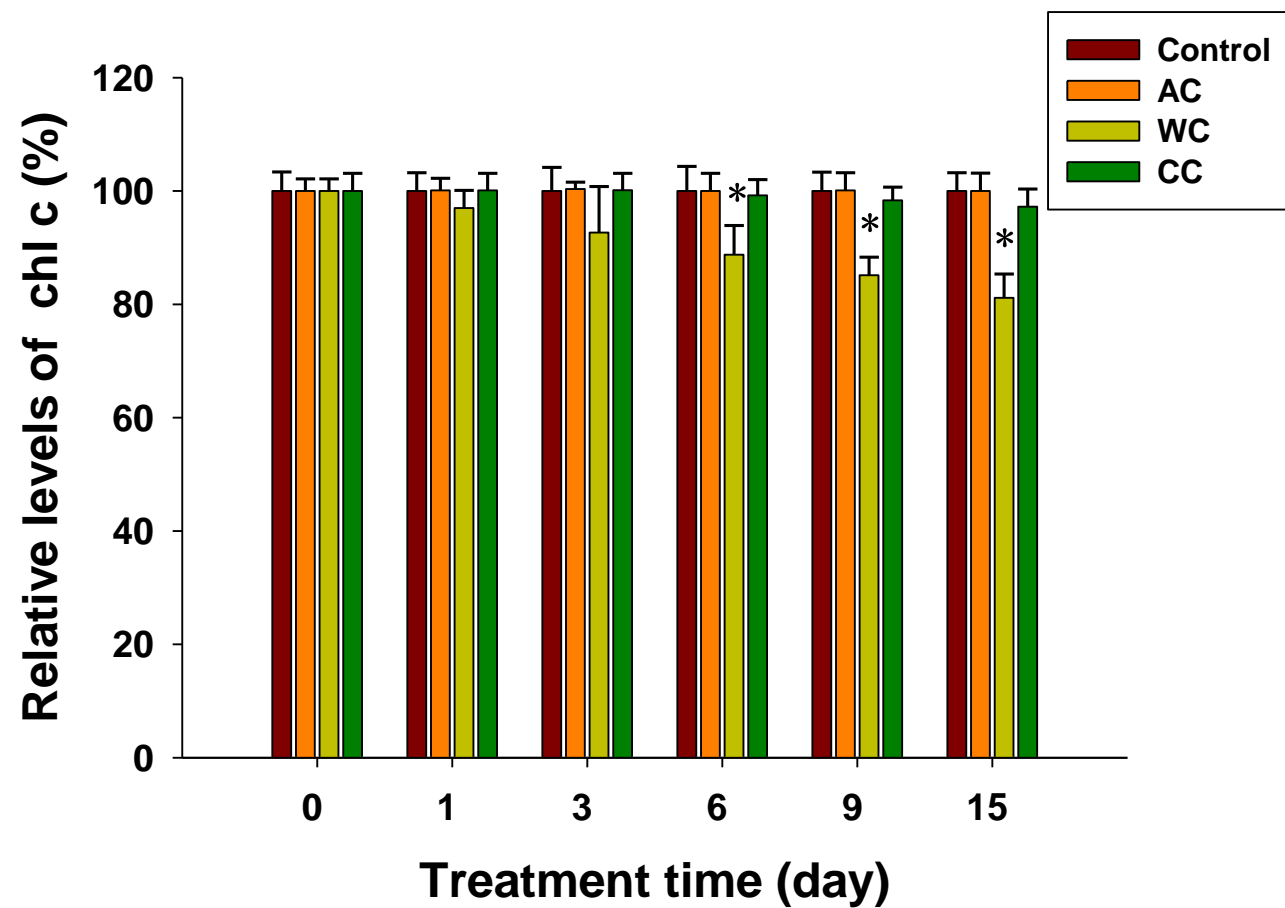

Supplement: s1 [file s1]

A

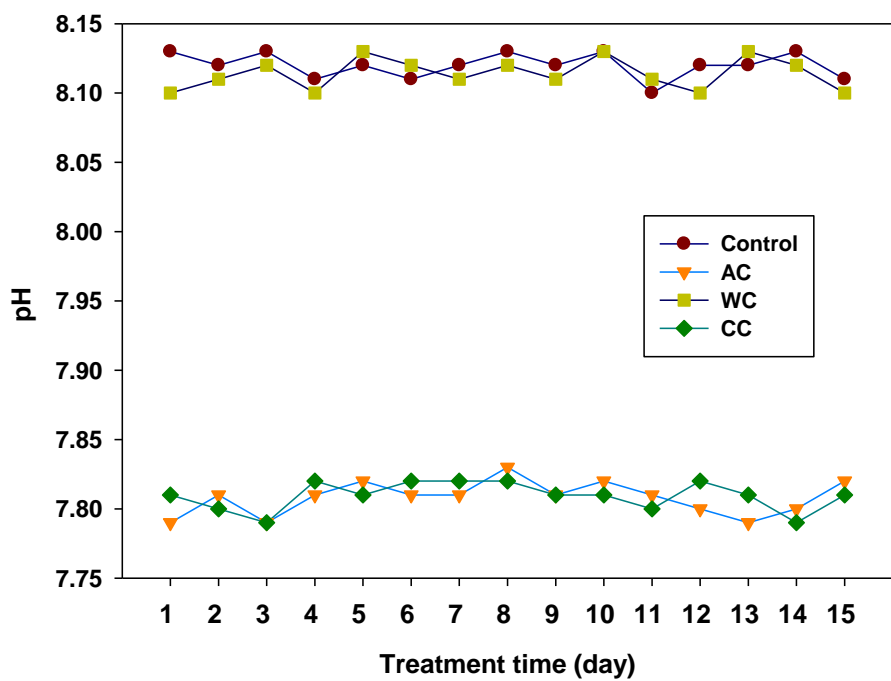

B

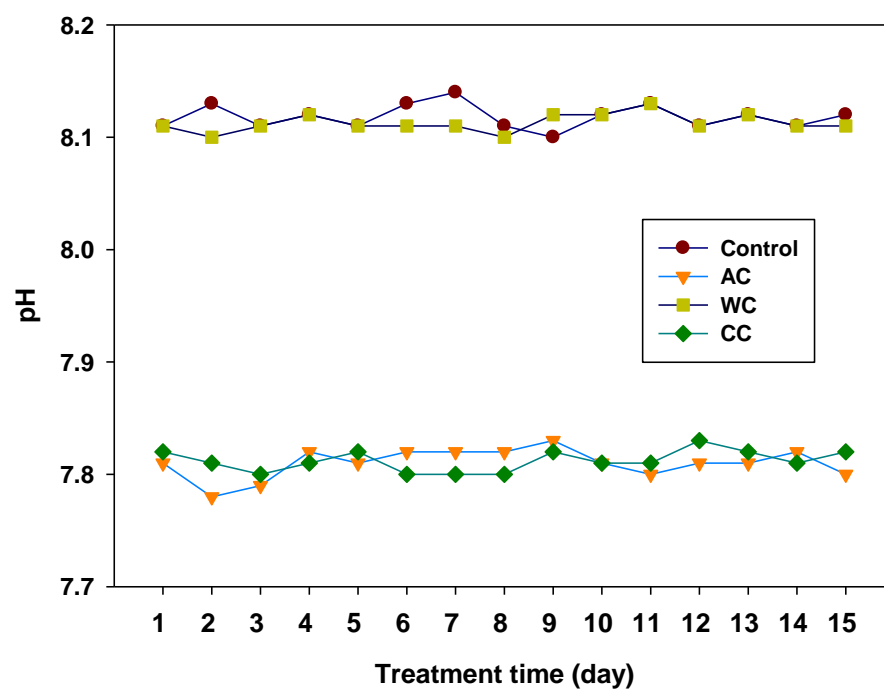

Supplement: s1 [file s1]

A

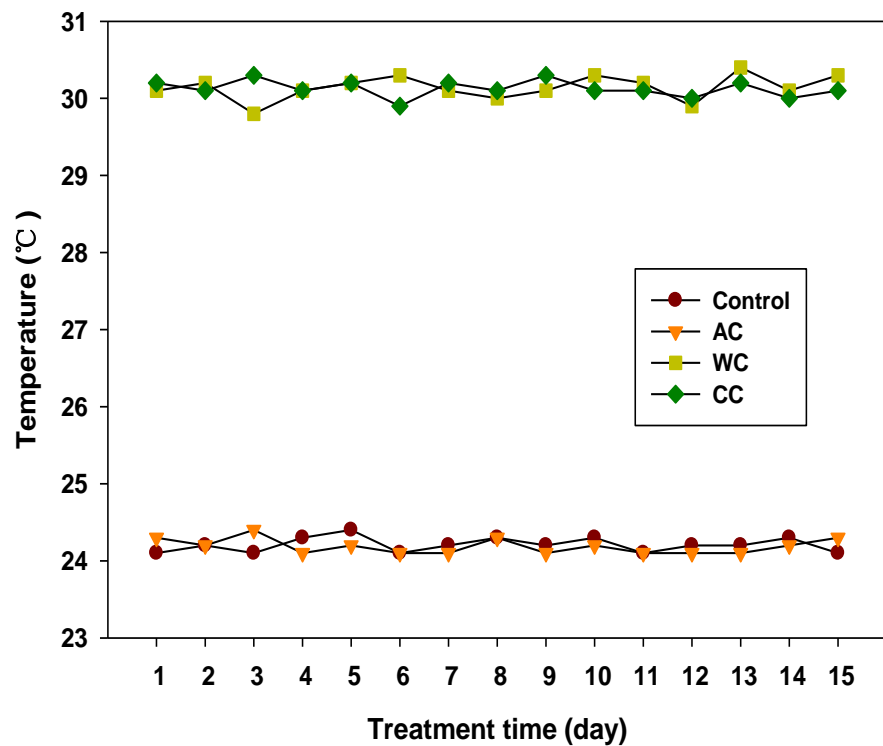

B

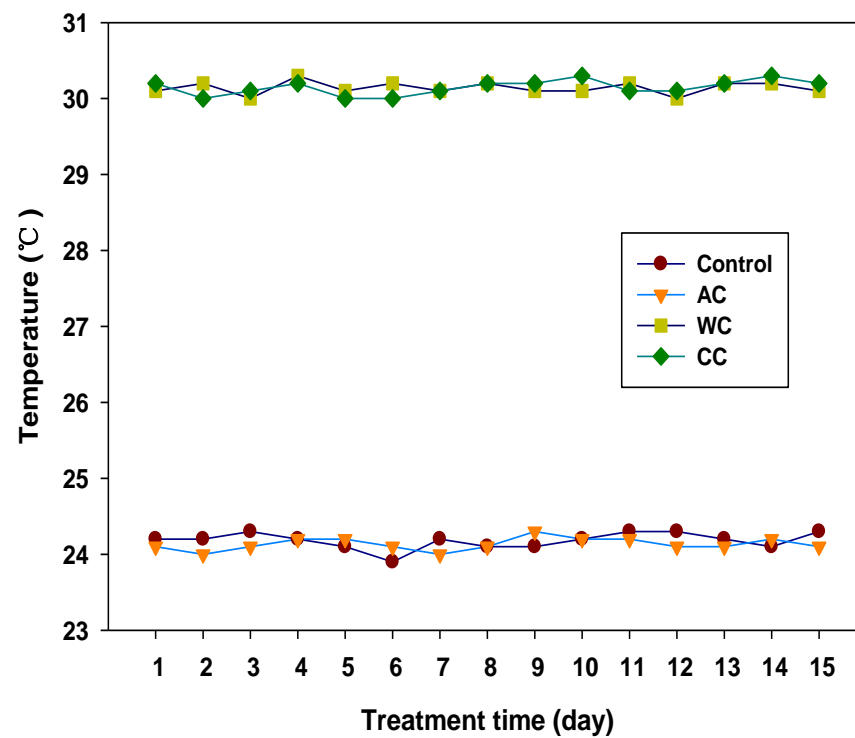

Supplement: s1 [file s1]
